# Supplementary material for: CRISPR/Cas9-based generation of knockdown mice by intronic insertion of artificial microRNA using longer single-stranded DNA
Source: PubMed Central journal article supplement (PMC4525291; doi:10.1038/srep12799), 2015-08-05
Supplement: srep12799-s1.pdf [file srep12799-s1.pdf]

## **Supplementary Information**

### **CRISPR/Cas9-based generation of knockdown mice by intronic insertion of artificial microRNA using longer single-stranded DNA**

Hiroimi Miura, Channabasavaiah B Gurumurthy, Takehito Sato, Masahiro Sato, Masato Ohtsuka

## Supplementary Tables

### Supplementary Table S1

**Supplementary Table S1** | Oligos used in the present study.

| Name                    | Nucleotide sequence 5'-3'                                                      |
|-------------------------|--------------------------------------------------------------------------------|
| M272                    | CAGGAAACAGCTATGACC                                                             |
| M322                    | TGCGCAACTGTTGGGAAG                                                             |
| M381 (eGFP123_top)      | TGCTGATGAACTTCAGGGTCAGCTTGGTTTTGGCCACTGACTGACCAAGCTGACTGAAGTTCAT               |
| M382 (eGFP123_bottom)   | CCTGATGAACTTCAGTCAGCTTGGTCAGTCAGTGGCCAAAACCAAGCTGACCCCTGAAGTTCATC              |
| M383 (eGFP419_top)      | TGCTGTGTAGTTGTACTCCAGCTTGTGTTTTGGCCACTGACTGACACAAGCTGGTACAACACTACA             |
| M384 (eGFP419_bottom)   | CCTGTGTAGTTGTACCAGCTTGTGTCAGTCAGTGGCCAAAACACAAGCTGGAGTACAACACTACAC             |
| M411                    | GGAATTCTAGTGAGTCGACCAGTGGATC                                                   |
| M412                    | GGAATTCTGGGTCTAGATATCTCGAGTGC                                                  |
| M939                    | AAAAAAAGCACCGACTCGG                                                            |
| PP101                   | CAGCAAACTACAGGTTATTATTGCTTGTGATCCGCCTCGGAGTATTTCCATCGTAGTGAGTCGACCAGTGGATC     |
| PP102                   | AAGGATCTCAAGCAGGAGAGTATAAACTCGGGTGAGCATGCTTTAATCTACCTTGGGTCTAGATATCTCGAGTGC    |
| PP103                   | GTAATACGACTCACTATAGGGCAGCAAACTACAGGTTATTATTGC                                  |
| PP104                   | AAGGATCTCAAGCAGGAGAGTA                                                         |
| PP105                   | TAATACGACTCACTATAGGGCTACCGGAAAGGGCCCGGAGTTTTAGAGCTAGAAATAGCAAG                 |
| PP106                   | TAATACGACTCACTATAGGGGGAGCGACTTCCCAAGGCTGTTTTAGAGCTAGAAATAGCAAG                 |
| PP109                   | TGACAGCCTGTAGGGCTGGCTTCCCTTGACACCTCCAGTGGGCTGAACGCCTTCCCTAGTGAGTCGACCAGTGGATC  |
| PP110                   | TGCTCACGTGTGAACTCAGATAGAAAACAGAGACGGGGGCTACCGGAAAGGGCCCTGGGTCTAGATATCTCGAGTGC  |
| PP111                   | TCCTGGACCCCATCTTCAAGGTGGGTAAGCTGTGGTCTCTGGCCTGTGTTCCAGCTAGTGAGTCGACCAGTGGATC   |
| PP112                   | GTTTGCACAAGGGAAGCAGATGAGCAAGGCCAGGTTCATGGGAGCGACTTCCCAAGTGGGTCTAGATATCTCGAGTGC |
| PP113                   | ATATCTGCGCGTCCCTGA                                                             |
| PP114                   | TGAGGCTCAAGTCACATAACC                                                          |
| PP115                   | TTGTGCTTGGTGATGTGG                                                             |
| PP116                   | CACACACCTCTCCCAA                                                               |
| PP117                   | TGGGGAGACCGGTGAGTA                                                             |
| PP118                   | GAGGCCCTCGTATAGCA                                                              |
| PP119                   | GCCAATGGCAAGTTCAGTA                                                            |
| PP120                   | GCCTTGAGCAATGGCTTG                                                             |
| PP123                   | GTAATACGACTCACTATAGGGTGACAGCCTGTAGGGCTG                                        |
| PP124                   | TGCTCACGTGTGAACTCAGATA                                                         |
| PP125                   | GTAATACGACTCACTATAGGGTCTGGACCCCATCTTCA                                         |
| PP126                   | GTTTGCACAAGGGAAGCAGA                                                           |
| PP130 (Otx2_518_top)    | TGCTGTATAGGTCATGGGATAGGACCGTTTTGGCCACTGACTGACGGTCTATCATGACCTATA                |
| PP131 (Otx2_518_bottom) | CCTGTATAGGTCATGATAGGACCGTCAGTCAGTGGCCAAAACGGTCTATCCCATGACCTATAC                |
| PP132 (Otx2_546_top)    | TGCTGTAGCCTTGACTATAACCTGAAGTTTTGGCCACTGACTGACTTCAGGTTAGTCAAGGCTA               |
| PP133 (Otx2_546_bottom) | CCTGTAGCCTTGACTAACCTGAAGTCAGTCAGTGGCCAAAACCTCAGGTTATAGTCAAGGCTAC               |
| PP164                   | CACCGTAGGCTTTGGTTCTG                                                           |

## Supplementary Table S2

**Supplementary Table S2 | Sequencing of PCR products amplified from modified genome**

| Exp. | Fetus | Band  | Strategy for sequencing                 | Primers used for sequencing | Note                     |
|------|-------|-------|-----------------------------------------|-----------------------------|--------------------------|
| 1    | #1    |       | sequencing after cloning of PCR product | M13 reverse                 |                          |
| 1    | #3    |       | direct sequencing of PCR product        | PP113                       | Supplementary Figure. S4 |
| 1    | #5    |       | sequencing after cloning of PCR product | M13 reverse                 |                          |
| 2    | #1    |       | sequencing after cloning of PCR product | PP120                       |                          |
| 2    | #2    |       | direct sequencing of PCR product        | PP120                       |                          |
| 2    | #3    |       | sequencing after cloning of PCR product | PP120                       |                          |
| 2    | #5    |       | direct sequencing of PCR product        | PP120                       | Supplementary Figure. S2 |
| 2    | #6    | upper | sequencing after cloning of PCR product | PP119, PP120                | Supplementary Figure. S3 |
| 2    | #6    | lower | direct sequencing of PCR product        | PP119, PP120                | Supplementary Figure. S3 |
| 3    | #10   |       | sequencing after cloning of PCR product | M13 reverse                 |                          |
| 4    | #3    |       | direct sequencing of PCR product        | PP120                       | Supplementary Figure. S6 |
| 4    | #4    |       | sequencing after cloning of PCR product | M13 reverse                 | Supplementary Figure. S7 |
| 4    | #5    |       | sequencing after cloning of PCR product | M13 reverse                 |                          |
| 4    | #6    |       | sequencing after cloning of PCR product | M13 reverse                 |                          |
| 5    | #4    |       | sequencing after cloning of PCR product | PP120                       |                          |
| 5    | #7    |       | sequencing after cloning of PCR product | PP120                       |                          |
| 5    | #8    |       | direct sequencing of PCR product        | PP119, PP120                | Supplementary Figure. S8 |
| 5    | #9    |       | sequencing after cloning of PCR product | PP120                       |                          |

Supplementary Figures

Supplementary Figure S1

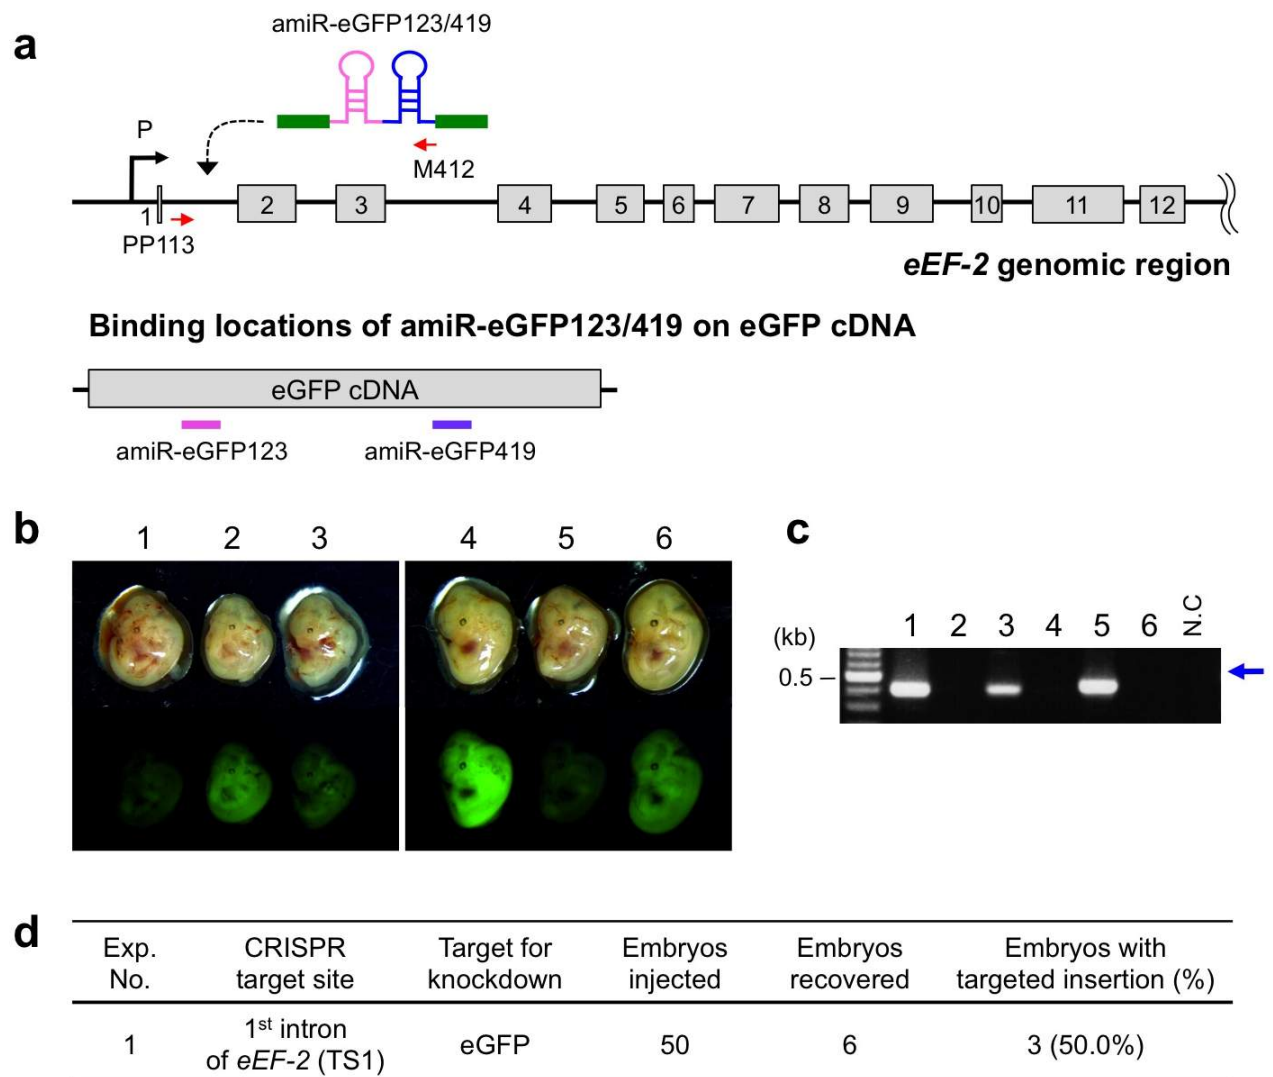

**Supplementary Figure S1 | Targeted insertion of ssDNA encoding anti-eGFP amiRNA by CRISPR/Cas9 system (Exp. 1).** (a) Schematics of targeted integration of amiRNA-eGFP123/419 into the intron 1 of *eEF-2* gene (upper panel) and location of amiRNA-eGFP123 and -eGFP419 target sites on eGFP cDNA (lower panel). From the correctly targeted *eEF-2* locus, amiRNAs get transcribed and subsequently bind to the target sites (amiR-eGFP123 = pink line and amiR-eGFP419 = purple line) on eGFP mRNA, leading to eGFP knockdown. Red arrows indicate the location of primer set (PP113/M412) used for detection of fetuses with targeted insertion. (b) eGFP fluorescence among E13.5 fetuses observed under a fluorescent stereomicroscope showing successful knockdown in some fetuses (see text for details). (c) Genotyping of fetuses by PCR using primer set shown in (a). The embryo numbers in (b) and (c) correspond with each other. Expected fragment sizes: targeted insertion = 562-bp (blue arrow). (d) Targeted insertion efficiency. Fetuses containing functional amiRNA sequence were considered as ‘embryos with targeted insertions’ even though insertions were not fully accurate.

Supplementary Figure S2

Exp.2-#5

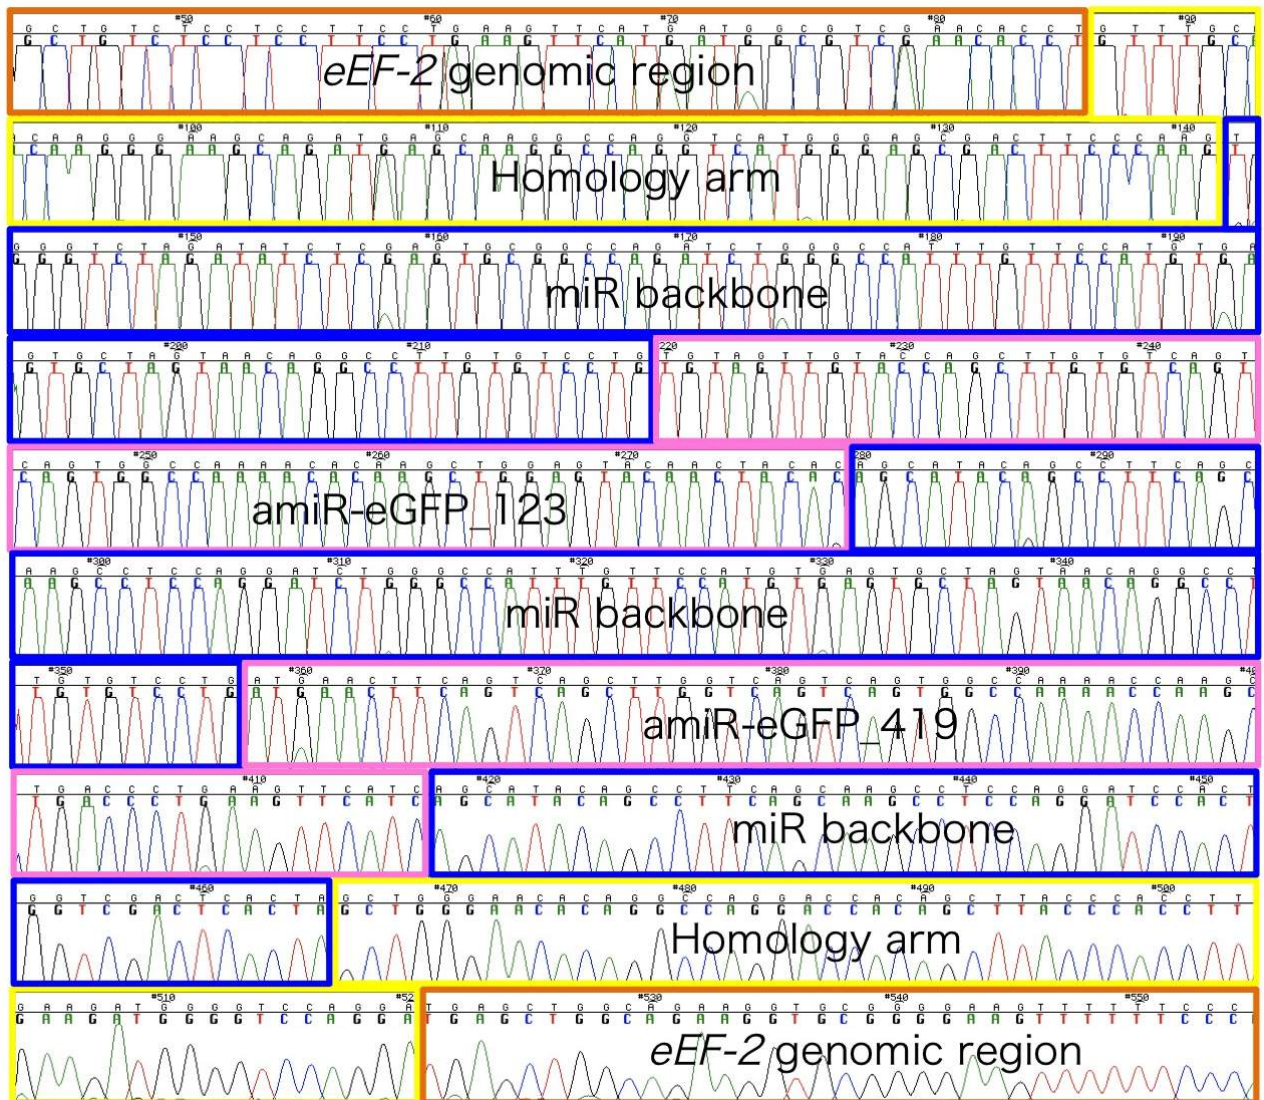

Supplementary Figure S2 | A representative sequencing reaction chromatogram showing correct insertion of ssDNA encoding amiRNAs against eGFP gene at intron 6 of *eEF-2*. The genomic sequence showing insertion derived from Exp. 2 sample #5 is shown.

### Supplementary Figure S3

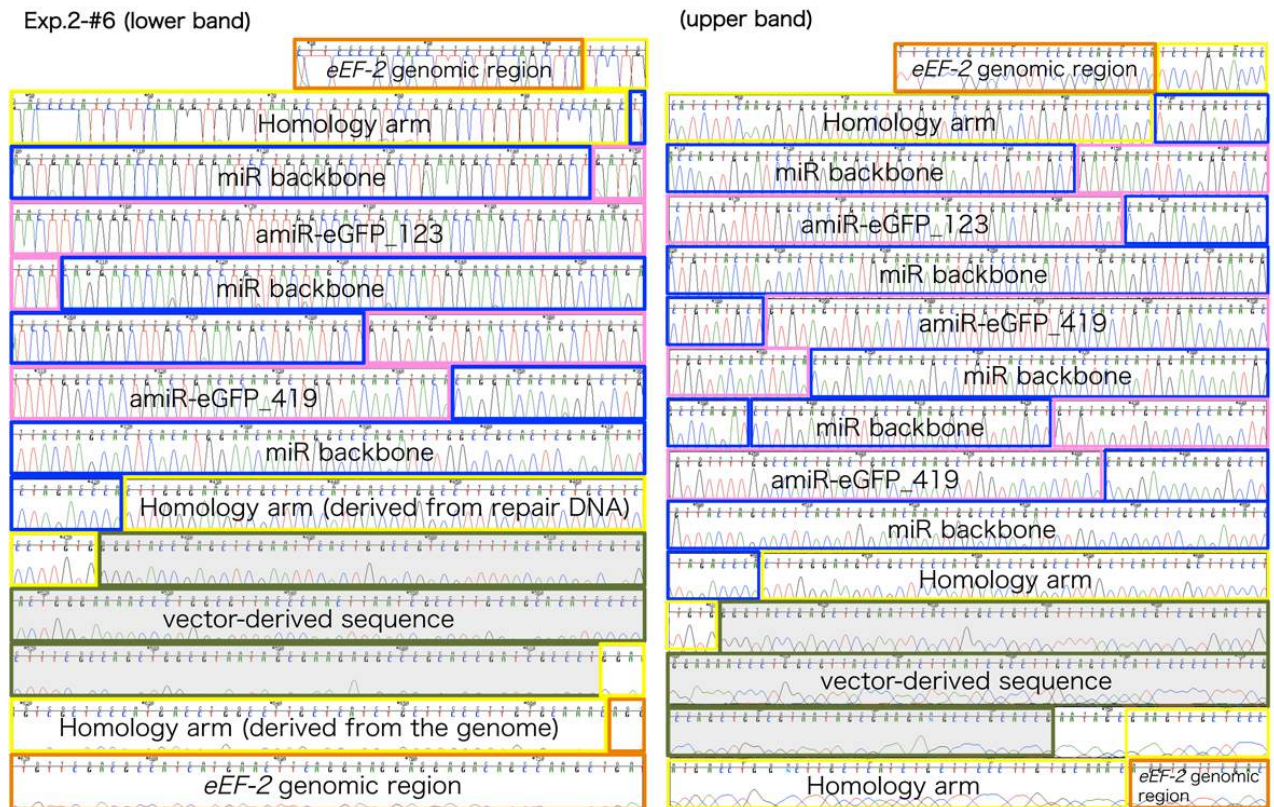

**Supplementary Figure S3 | Sequencing reaction chromatograms showing insertion of ssDNA encoding amiRNAs against eGFP gene at intron 6 of *eEF-2*. The inserted genomic sequences (left for lower band and right for upper band) showing insertion derived from Exp. 2 sample 6 is shown. Vector-derived sequence region is shaded in gray.**

Supplementary Figure S4

Exp.1-#3

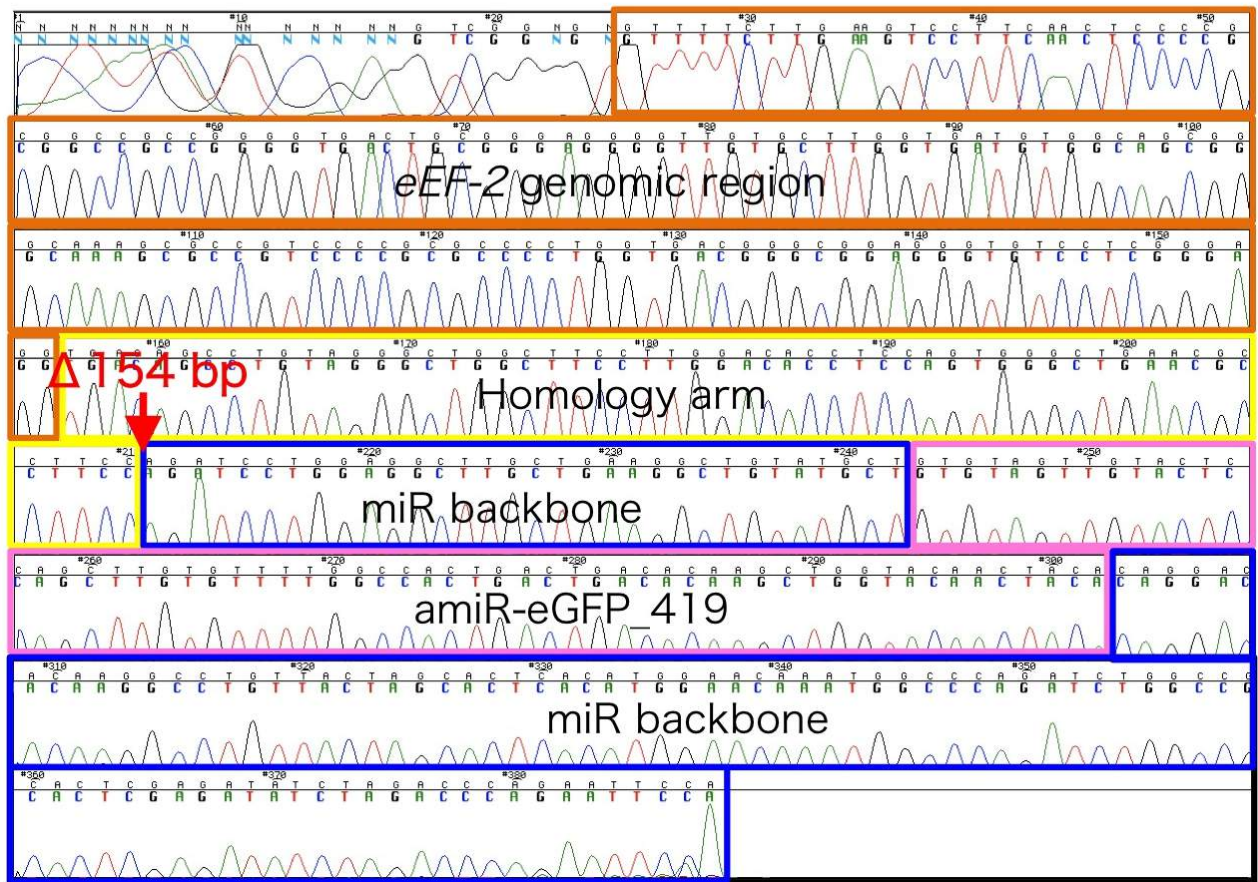

Supplementary Figure S4 | A representative sequencing reaction chromatogram showing insertion of imperfect ssDNA encoding amiRNAs against eGFP gene at intron 1 of *eEF-2*. The inserted genomic sequence showing insertion derived from Exp. 1 sample #3 is shown.

Supplementary Figure S5

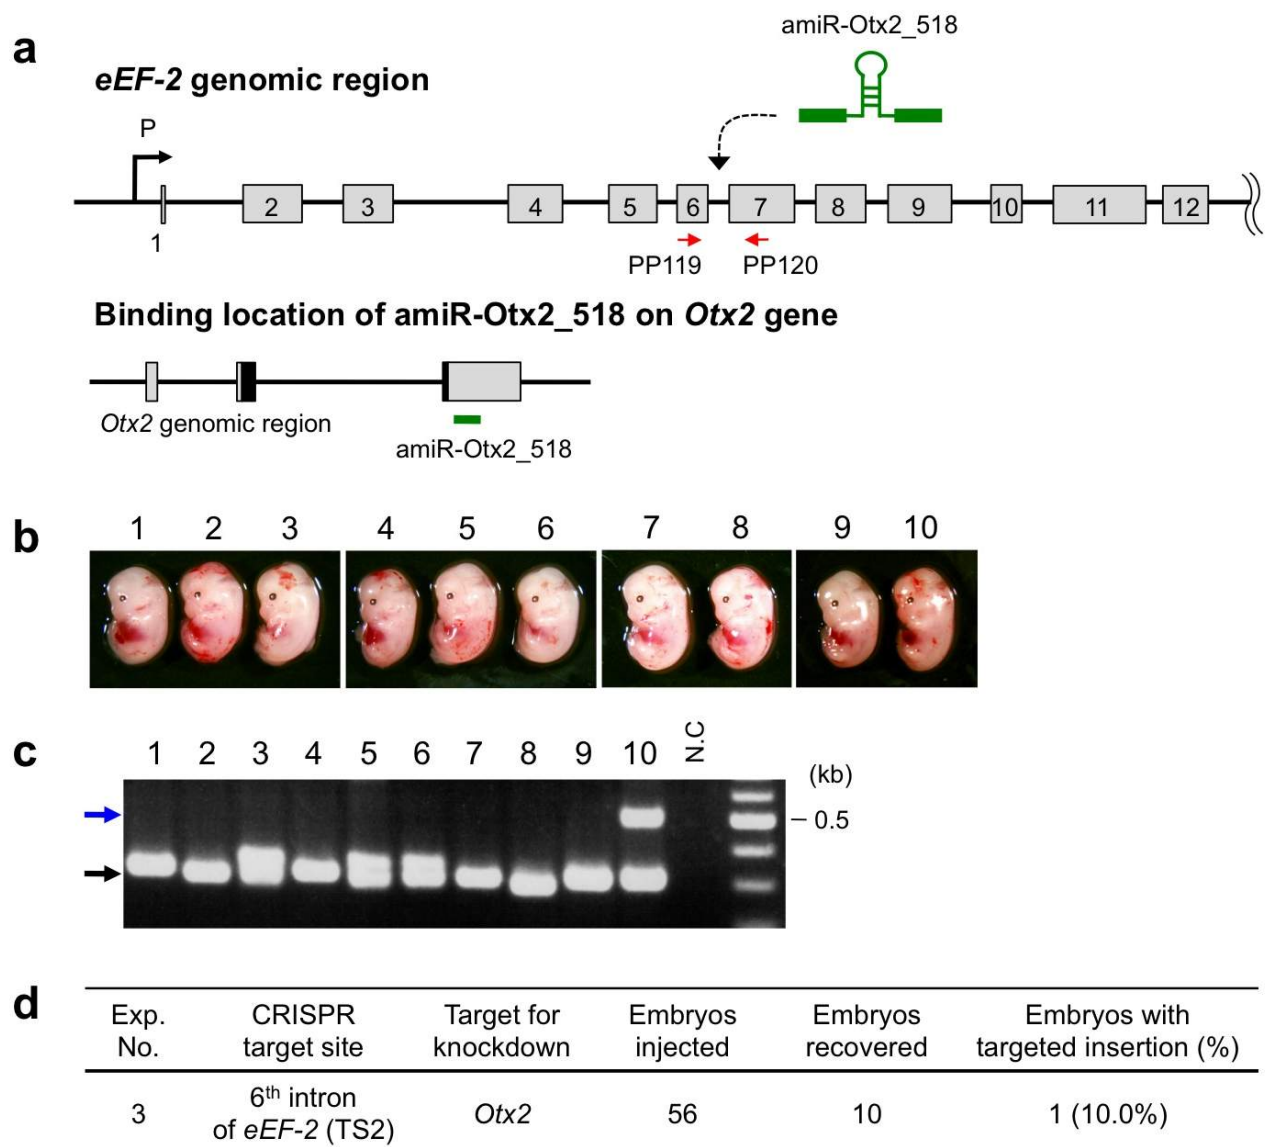

**Supplementary Figure S5 | Targeted insertion of ssDNA encoding anti-*Otx2* amiRNA by CRISPR/Cas9 system (Exp. 3).** (a) Schematics of targeted integration of amiR-Otx2\_518 into the intron 6 of *eEF-2* gene (upper) and *Otx2* genomic region showing amiRNA-Otx2\_518 binding site (lower panel). The exons of *Otx2* are shown as boxes and the boxes with homeodomain region are shaded black. Red arrows indicate the location of primer set (PP119/PP120) used for detection of fetuses with targeted insertion. (b) The resultant fetuses photographed at E14.5. (c) Genotyping of fetuses by PCR using primer set shown in (a). The embryo numbers in (b) and (c) correspond with each other. Expected fragment sizes: wild-type = 301-bp (black arrow), targeted insertion = 487-bp (blue arrow). (d) Targeted insertion efficiency.



Supplementary Figure S6

Exp.4-#3

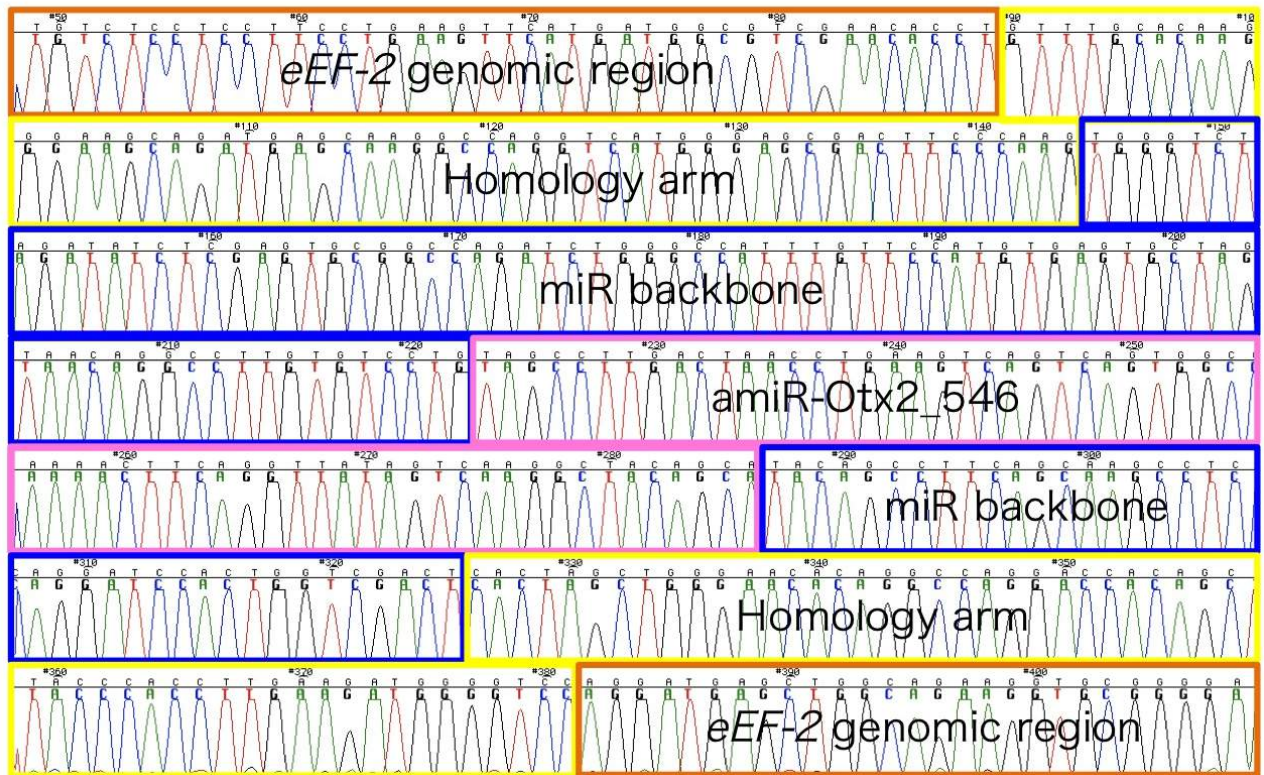

**Supplementary Figure S6 | A representative sequencing reaction chromatogram showing correct insertion of ssDNA encoding amiRNAs against *Otx2* gene at intron 6 of *eEF-2*. The genomic sequence showing insertion derived from Exp. 4 sample #3 is shown.**

Supplementary Figure S7

Exp.4-#4

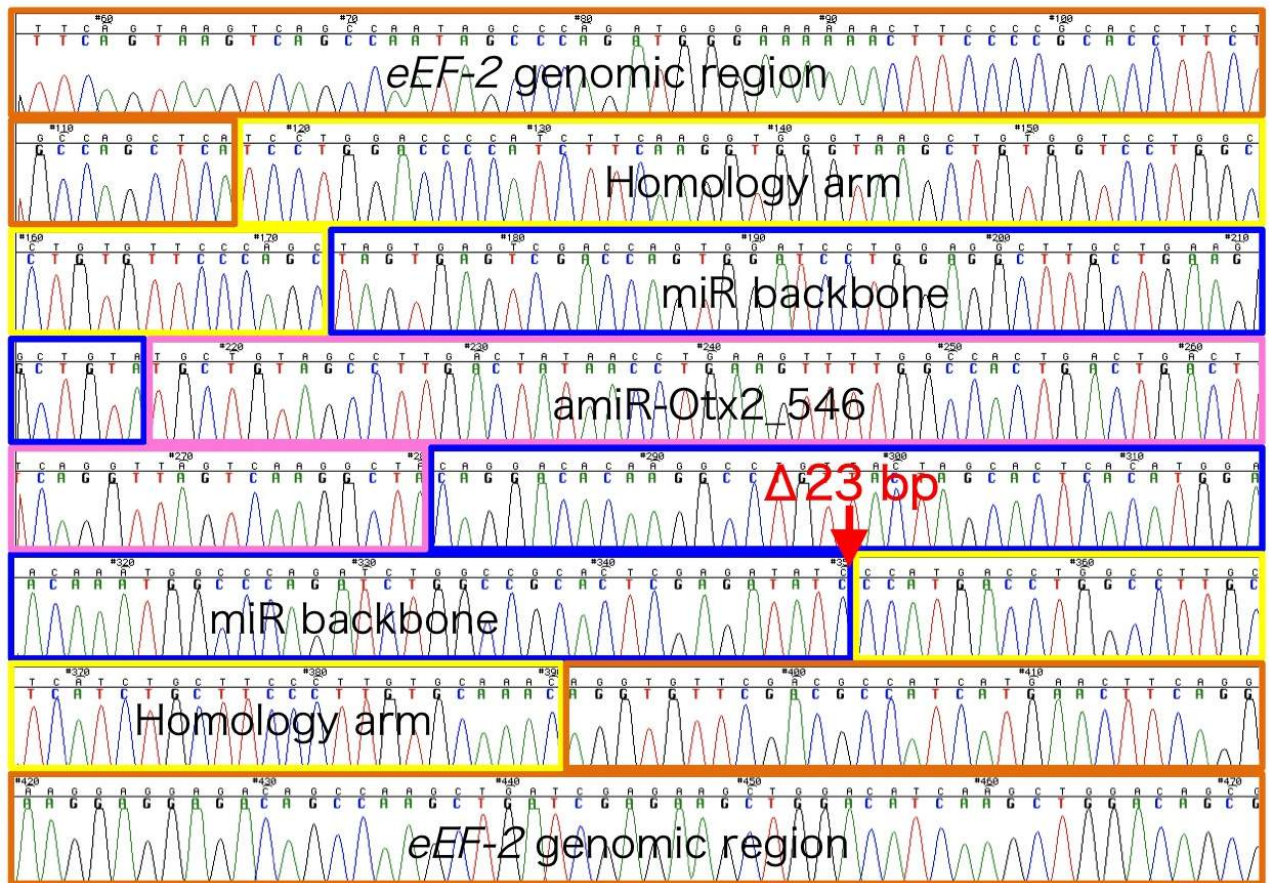

**Supplementary Figure S7 | A representative sequencing reaction chromatogram showing insertion of imperfect ssDNA encoding amiRNAs against *Otx2* gene at intron 6 of *eEF-2*. The genomic sequence showing insertion derived from Exp. 4 sample #4 is shown.**

Supplementary Figure S8

Exp.5-#8

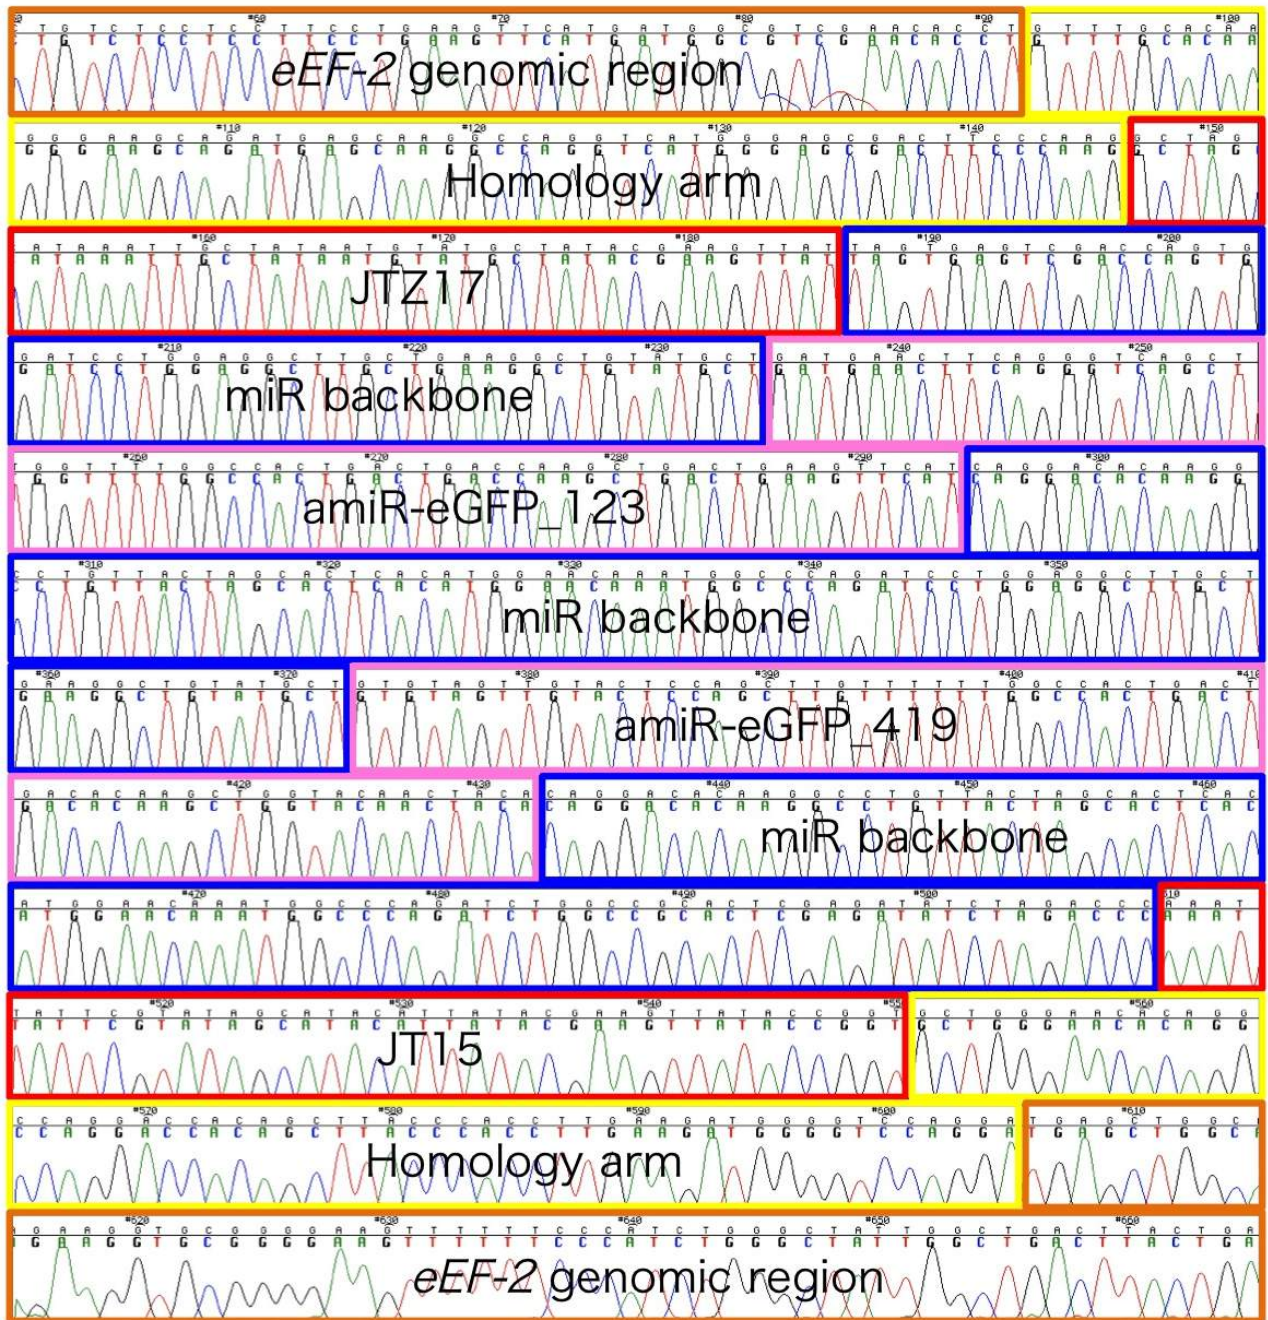

Supplementary Figure S8 | A representative sequencing reaction chromatogram showing correct insertion of ssDNA encoding amiRNAs against eGFP gene at intron 6 of *eEF-2*. The genomic sequence showing insertion derived from Exp. 5 sample #8 is shown.

Supplementary Figure S9

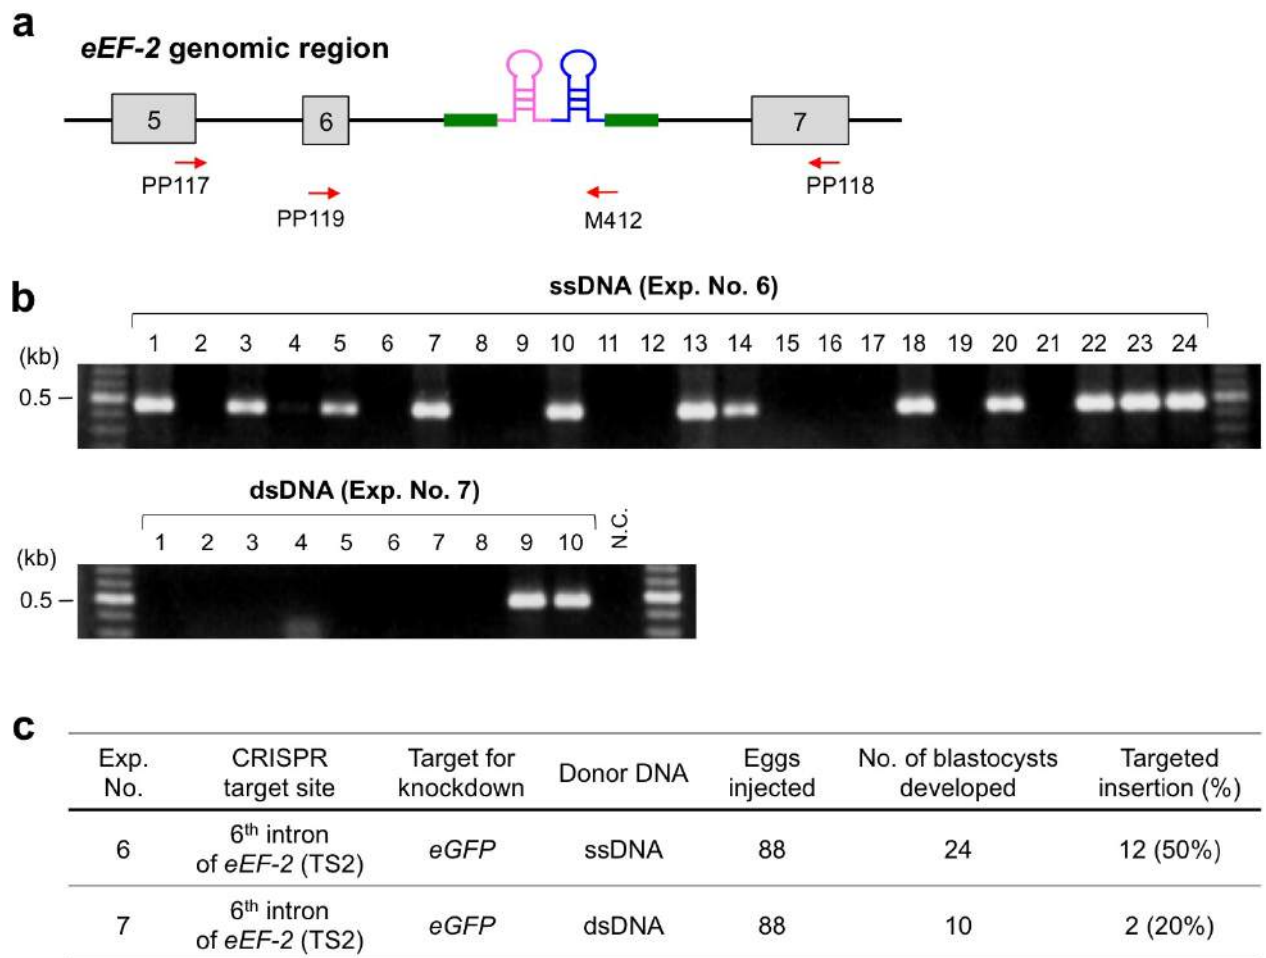

**Supplementary Figure S9 | Comparison of insertion efficiencies of ssDNA or dsDNA repair templates (encoding anti-eGFP amiRNA) by the CRISPR/Cas9 system (Exp. 6 and 7).** (a) Genomic structure of *eEF-2* locus with targeted integration of amiRNA-eGFP123/419. Red arrows indicate the location of primer sets (PP117/PP118 and PP119/M412) used for detection of blastocysts with targeted insertion by nested PCR. ssDNA (in Exp. 6) or dsDNA (in Exp. 7) containing amiR-eGFP123/419 and homology arms with 55-bases long on each side were prepared and used as repair DNAs. Each of the repair DNA (20 ng/μl) was subjected to micro-injections together with Cas9 mRNA (10 ng/μl) and sgRNAs for TS2 (10 ng/μl). (b) Genotyping of blastocysts by nested PCR using primer set shown in (a). Expected fragment size: 459-bp. (c) Targeted insertion efficiency.

Supplementary Figure S10

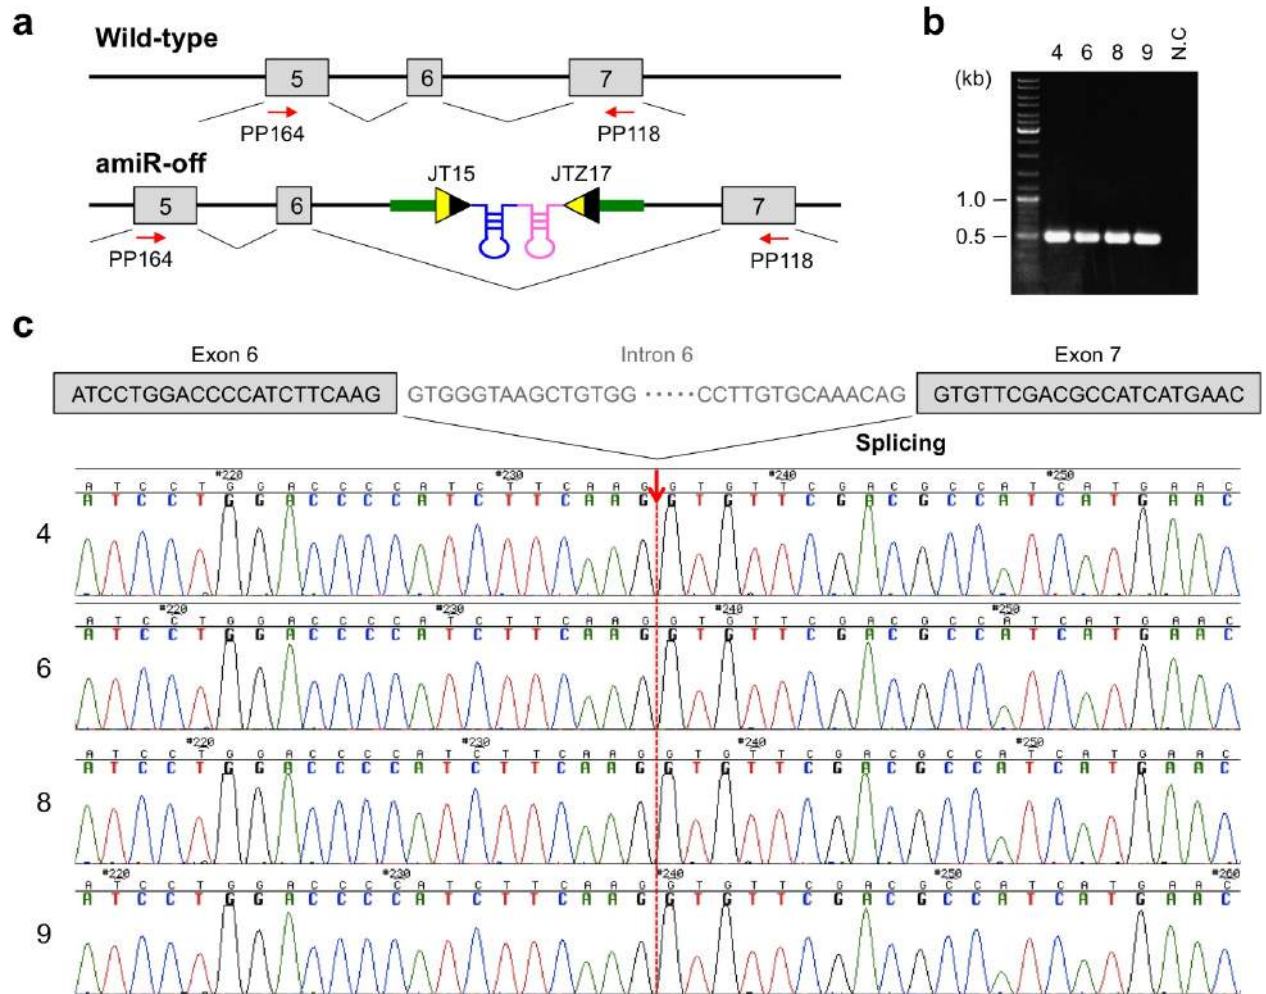

**Supplementary Figure S10 | Insertion of sequences in the *eEF-2* intron 6 does not affect its mRNA splicing.** (a) Genomic structure and expected splicing pattern of wild-type and ‘*amiRNA-off*’ alleles (containing reverse orientated ‘*amiRNA-eGFP123/419*’ and mutant *loxP* sites) of *eEF-2* gene. Red arrows indicate the location of primer set (PP164/PP118) used for reverse transcription PCR (RT-PCR). (b) RT-PCR results using cDNAs prepared from embryonic feeder cells derived from the fetuses in Exp. 5 (see Figure 4). The sample numbers in (b) correspond with those in Figure 4b. Sample No.6; wild-type allele, No.4 and 9; heterozygotes for ‘*amiRNA-off*’ allele, No.8; homozygote for ‘*amiRNA-off*’ allele. Expected fragment size: 500-bp (from cDNA). (c) Nucleotide sequences of RT-PCR products. Junctional regions between exon 6 and 7 are shown.



TGACCACTGGCAGATCTGCCTGGGGATCCTTTTGACAACAGCAGCCGCCAGCCAAGTGGTAGCTGAGACCGCGCAAGCGCAAGG  
 GCCTGAAAGAGGGCATCCCAGCGCTGGACAACCTTCTGGACAACCTGTAGGCAGCCTGATACTGCCACATGCTGCACAGTGCCAC  
 CCATCAGAAGACACCTTGAGACTGTCCCACAGTGCTCCTCTAGAGGCTGCTGGGGCCACCCTGACATCACTCAGCACTCACTTGCTA  
 CCAATTTCTATTTATTCGGAATTACAAGATAGCGGGAATCTCTGTCAGGCTGGACTGGCAGGCTGTGGGGTGGGCGGGACACGGCT  
 CTTAACATTTTCAGAGGGAAACCGCGCAGATGTCCAAAAAGTCTAAATAAATGCATTAGAGGTTTTTGGGGTCCATGGCCAAGTGGAG  
 TTCCCCAGAGGGGAGGTGGGGTAAGTGCCTCCAGAAAGCAGGCGCCTTAGACTTGCAGCCCGGCTGTGGGAATGAATC  
 ATTTGGAGTAATAAACTACAGTGGTTGATCCACATGTGCTCGCAACTCTGTTTTGTACAGCGCACGCTTTCCTGGTTTTACAGGGTATCT  
 GGCTACCCTTAGGTGGCTGCGGTGATTCACACATAACACACACTGCACCCCGTGGCAGAGAATGGGTTTTATTGTGAGTTCACA  
 GTACTGCCTCAGTCCATTCCACAACTTGAATCACTCCATAGACCTGCACATCAGGGGTTTTGGTCTGCGCATAACCCGGCTCCAGGTTA  
 TTGGCTTTCAGCCTCTCGCTTAGCCAATCATCAGCCAGGAGCCCAATAATGATGTGCTCCACAAGGGCGGTGTCGAGCCTTCCTGT  
 GAATCTGTCAAGCTGGCCAATGAGCACTGGACTCTCGCTAGCCTTGGGTGATGACGTCACTAGTCAACGTCCGCTTCCGCTGAGAG  
 GTCAGATGCTAACCAATGAGCGTGTGCATTCAATTTCCGGTTAAAGTCGTAGTCCAATGAGCGTGGTTTTCCGGTTTTGCGGAGGT  
 GTGCCCTGCGCTGTACGCGCATGCGTAGATGCCGTCTCAGGATTTGTACCGAGGTTCTCGCGGGGGCTCGCTGGCACCGGGCGG  
 GGACTCGATGGCTGAGGACGGTACGAATGGG

| Gn.Ex | Type   | S | .Begin | ...End | .Len | Fr | Ph | I/Ac | Do/T | CodRg | P.... | Tscr.. |
|-------|--------|---|--------|--------|------|----|----|------|------|-------|-------|--------|
| 1.00  | Prom + |   | 580    | 619    | 40   |    |    |      |      |       |       | 1.19   |
| 1.01  | Init + |   | 697    | 699    | 3    | 0  | 0  | 117  | 101  | 0     | 0.419 | 4.13   |
| 1.02  | Intr + |   | 1635   | 1849   | 215  | 2  | 2  | 104  | 94   | 461   | 0.684 | 46.34  |
| 1.03  | Intr + |   | 2023   | 2204   | 182  | 1  | 2  | 104  | 107  | 360   | 0.996 | 39.53  |
| 1.04  | Intr + |   | 2651   | 2862   | 212  | 0  | 2  | 92   | 54   | 573   | 0.994 | 53.46  |
| 1.05  | Intr + |   | 3051   | 3229   | 179  | 2  | 2  | 100  | 117  | 244   | 0.996 | 27.73  |
| 1.06  | Intr + |   | 3316   | 3421   | 106  | 1  | 1  | 92   | 98   | 143   | 0.999 | 16.42  |
| 1.07  | Intr + |   | 3514   | 3766   | 253  | 0  | 1  | 105  | 71   | 482   | 0.988 | 45.74  |
| 1.08  | Intr + |   | 3852   | 4047   | 196  | 1  | 1  | 89   | 64   | 248   | 0.998 | 21.49  |
| 1.09  | Intr + |   | 4123   | 4381   | 259  | 1  | 1  | 75   | 69   | 433   | 0.977 | 38.10  |
| 1.10  | Intr + |   | 4535   | 4642   | 108  | 1  | 0  | 70   | 86   | 165   | 0.999 | 15.48  |
| 1.11  | Intr + |   | 4774   | 5127   | 354  | 0  | 0  | 97   | 107  | 632   | 0.998 | 62.04  |
| 1.12  | Intr + |   | 5198   | 5380   | 183  | 1  | 0  | 56   | 93   | 218   | 0.999 | 19.60  |
| 1.13  | Intr + |   | 5463   | 5595   | 133  | 2  | 1  | 82   | 97   | 136   | 0.999 | 14.62  |
| 1.14  | Term + |   | 5859   | 6052   | 194  | 1  | 2  | 96   | 48   | 341   | 0.739 | 28.81  |
| 1.15  | PlyA + |   | 6306   | 6311   | 6    |    |    |      |      |       |       | 1.05   |

>miR-eGFP-6th\_int\_eEF2 (used in Exp. No.2)

GACAAAAAAGTTTCATGAGAGCGTGGTGTGTTGGCACAGTCTTTTAGTCCGAGCACTGACGCAGTAGATTAAGGCAGATCTTCATG  
 ATTTGGTGCCTGCTGGGCTGCATCCAAAGACCTTGTTCAAAACAAACAAACGAAAAAGTGTAAATAAAAAATACAAGCAAGGTTT  
 TGCAGAAATAAATCTGTGGCCTCAAGGGTCCCTTTCTCCAGCTTTTCCCAGAGGTGTCAAATTACATAACAGTCTCAAACCCAGGAA  
 ATTGAACCTTGGCACAAACCCACTGACCGTCCGAATTTCAAAGTCTTTTCTATTGACCTACAAGTTTTCAAGAATCATGTTGTAA  
 GCAACTGTGTTCTGAGGAATCTATGTTAAAAAACCATCCGTGGATCTTGGCCCAGGGTCCAGAGACTGAGCTAGCCACGCCCCGGC  
 CGCGCCGACGCCACTCCACGGCAGTTCAAGTGTAAAGTCCAAAGACCGCGCTCTGTGCATGCGCAGACCCGTCCACAGCTGGCTC  
 CTAGCCAAACCCGGCCGACGAGCACCAGCGCCGCTACGTGACGCACCCAAACCGGCGTCCGACTATAAAAAGGCCGGGCGTTGACGT  
 CAGCGTCTTCCGCGCAGCCGCCCATCTCGGCGCGCTTCCCTGTCACTCTGACTCTGAGAATCCGTCGCCATCCGCCACC  
 ATGGTGAGTCTCCTCGGCTCCGCTAGACTCGGGGACCGAGACGAATCTCTGGGGCAGCGGGACGTGGCTGTAGCGGGACGCTGAGA  
 GGGACGGGAGGAAGAGACATGGCTGCCCTGGCCCGGGCGGCAGGACGTGGTCCGGCCGCGGCCATATCTGCGCGTCCCTGAGG  
 GCCTTGGGAGTGTCAACTGCCGAGGTCCGGGTGTTTTCTTGAAGTCTTCAACTCCCCCGCGCCGCCGGGGTACTGCGGGAGGGGT  
 TGTGCTTGGTGTATGGCAGCGGCAAGCGCCGTCGCCCGCCCTGGTACGGGGCGGAGGGTGTCTCGGAGGTGACAGCCCTG  
 TAGGGCTGGCTTCTTGGACACCTCCAGTGGGTGAACGCCTTCCGGGCCCTTCCGGTAGCCCCGCTCTGTTTTCTATCTGAGTT  
 CACACGTGAGCACCAGTCCCAATAATCTAAGAAAGTGGCTCACTGGGCTAGTGGCGCATTGTGGCCTTTGATCCGGGCTTTGACCT  
 TGGCGCACAGCACCAGTGGTTGGGGAAGAGGTGTGTGTAGCAGAGGAGGTTTTTTCGTGCTTTGGTCCCAATCAATCCGGCATCT  
 TTGCAGTGGCAGGTGGCCGTGCACCTTGGCTTTGAATCTTGTGCTGAGGTTATGTGACTTGAACCTCAAGATAGGGTCTTCTAGCA  
 CAGGCTTGTCTTAAAGTGTGCGAGTTGTCGGTTTCGGGCTTGGTTAGAGGTGTGGACACATCTGTGAACCTTTTATGCTTATTTCAG  
 AGGTCTGGGTTGTACGTTTGTAGTCACTGTGAGCTCAGTCCAATCTGGGCCGACATCTGGTTCCTGCCCTGCTGTGGGGTGCT  
 ATTGACCCACCGATGCCTGCCAAGTGGGTTCACAGAATCAGCTGGCTGCCATCCCCCACCACAGGTGAACCTCACAGTAGATC  
 AGATCCGTGCATCATGGACAAGAAAGCAACTCCGGAACATGTGAGTATCGCCATGTGGACCACGGCAAGTCCACGCTGACC  
 GACTCCCTGTGTGCAAGCTGGCATCTTGCCTTCCAGTCCAGGAGTCCGCTTCACTGACACTCGCAAGGATGAGCAGGAG  
 CGCTGCATACAATCAAATCCACGTGAGTGTAGGGGACAGCCCCGAGGGGTTGTGCTCTGGGTGTCACTCGGGTGTGTTTGTGCCAG  
 TGGACAAATAGTGGCGTGTAGGGTCTCTGTGACATGCTTGTGTGTGCTGCCTAGCCTGCCTTGGTACAGATGCTGAATGGACTG  
 TTGACCTCTTCTCCTCCGATCGCCATCTCCCTTCTACGAGCTCTGTGAGAACGACCTGAACCTCATTAAAGCAGAGCAAGGATGGC  
 TCGGGTCTCTCACTCACTCTCCAGCTCTCCAGGCTATGGACTCTCTTACAGAGGTGACAGTGCCTGCTGTCCGCTGACCGATGGG  
 CTCTGGTGGTGGACTGTGTGTCTGTAAAGCCTGGGTGGGAGCTGTAACAGACAGTTGCTGGTGTTCATGCCCCAGTACCAC  
 ATTTTGGGGGTGTAATGAAATCATATTCATTTAAAGCAAGGATGAATCTGCTCAATTTGAAATGTATGTGCCAGTCCCCAT

GTCAGGGCAGGGAGATTGTGAAGTCCACCTAAGTGTGGGGCAGTTTCTATAATTTAGTGTCTGAGGCAGAGGTGCATGGGTCT  
CTGGAGGTGGAGGGGCTGAGTGGCATAGGGCCTGGTACACTGGACACACTTGGAGATTTAGCGCTGGGCATCCATACCGTGTAC  
CTTGGAGAGTGTCTGTGTACATTTACAGACAAAAATACGTGGTCTTCAGGCCTTGAAGTGTACAGTGGTTTLAGAGTACTTGAGAGT  
TAAGGGTAAACTTAGTCTTTTACCTGTCTCAGGGTGTGTGTCAGACAGAACTGTGCTGCGCCAGGCCATCGCTGAACG  
CATCAAGCCCGTCTGATGATGAACAAGATGGACCGGGCCTGCTGGAGCTGAGCTGGAGCCCGAGGAGCTTACCAGACCTCC  
AGCCACTCGTGGAAACGTCAACGTATCTACTACCTACGGCAGGGCGAGAGTGGGCCAATATCATGGTGCAGAGC  
TCTTCTATGGGGCGGTGACAGGGCCACGCTCCCTGGGAATCTCTGACCCACCATGATGACGGAATTTCTACTTTGCTGATGTCT  
GTTGAAGAACTCAGTGTCTGAGACTGTGGGCTTGTGGCTGGGTGGCTGCTGACCATCTTGCCGGGCTAACTGTGCTCTCCCTCCCT  
CAGATTGACCCCGTCTGGGCACCGTAGGCTTTGGTTCTGGCCTGCATGGCTGGGCCCTTACCTGAAGCAGTTTGGCGGAGATGTAT  
GTGGCCAAGTTTGCAGCCAAGGGTGAAGGGCAGCTGAGCCAGCCGAGCGTGCCAAGAAAGTAGAGGACATGATGAAGAAGCTGT  
GGGGAGACCGGTGAGTACATGGCTGTGTGACTGTCTTACCCCTGCTACTTGTGGACAATGCCTGCCTGCCTGATGACTGCTG  
TCTTACAGGTTACTTTGATCCGGCCAATGGCAAGTTTCAAGTACAGCAATAGCCAGATGGGAAAAAACTTCCCCGCACCTTCTG  
CCAGTCTATCTGGACCCCATCTTCAAGGTGGGTAAGCTGTGGTCTGGCCTGTGTTCCAGCTAGTGAGTGCACCAAGTGGATCCTG  
GAGGCTTGTGAAGGCTGTATGCTGATGAACCTCAGGGTCACTTGGTTTTGGCCACTGACTGACCAAGCTGACTGAAGTTTATCAG  
GACACAAGGCTTACTAGCACTACATGGAAACAAATGGCCAGATCTGGAGGCTTGTGTAAGGCTTGTGTAAGGCTTGTGAT  
TCCAGCTTGTGTTTTGGCCACTGACTGACACAAGCTGGTACAACACAGGACACAAGGCTGTTACTAGCACTACATGGAAACA  
ATGGCCAGATCTGGCCGCACTCGAGATATCTAGACCACTTGGGAAGTGCCTCCATGACCTGGCCTTGCTCATCTGCTCCCTTGT  
GCAACAGGTGTTGACGCCATCATGAACCTCAGGAAGGAGGAGACAGCCAAGCTGATCGAGAAGCTGGACATCAAGCTGGACAG  
CGAGGACAAAGACAAGGAGGGCAAGCCATTGCTCAAGGCTGTGATGCGCCGCTGGCTGCCTGCCTGCAGGGGACGCCCTCAGTA  
TCACCATCCACTTACCATCCCCGCTACTGCACAGAAGTACCCTTGTGAGCTGCTATACGAGGGGCTCCCGACGATGAGGCCGCCA  
TGGGTATGTAAGTGTAGGGGCTCCTGGGCTTAGCTCTTGGTCTCCAGCCTTGGCAACCAGTGTACTGATTCCCAACTTCCATAG  
GTATTAAGAGCTGCGACCCCAAAGGCCACTTATGATGTACATTTCAAGATGGTGCCAACCTTGCACAAAGGCCGCTTCTATGCCT  
TTGGTAGAGTGTCTTGGGTGGTGTCCACGGGCTGAAGTCCGGATATGGGCCCACTACAGCCTGGGAAGAAGAGGAC  
CTATACCTGAAGCCTATCCAGAGGTGGGCACTGGCCTTATTTCTGATGCTGCTTCCAGGACCTTCCAGGACCTGATGTTGAGCTTGC  
CTCCCTTAGAACCATTCTGATGATGGGCCGCTACGTGGAGCCGATTGAGGACGTGCCATGTGGAAACATTGTGGGGCTGGTGGAG  
TGGACCAGTTCCTTGTGAAGACGGGGACCATCACTACCTTGTAGCAGCTCACAACATGCGCGTGTGAAGTTTACGCGTCAAGCCCTG  
TCGTCCGTGTGGCAGTGGAGGCCAAGAACCAGCTGACCTGCCAAGCTGGTGGAGGGGCTGAAGCGGCTGGCTAAGTCTGACCCT  
ATGGTGCAGGTGTGCCACTAGGTCTTGGCTTATTGTGGTGGAGAGGGGAAACACCTGGCAAAAAGCAGGGGAGGGCTGAGGATAGG  
CCTGTATTGGCTGTGTGCATAGGGCTGAGCCCTATGCCTGGGAGGACGGCAGGGTGTGACCATTGTTCCACAGTGCATCATTGA  
GGAGTCTGGAGAACATATTATTGTGGCGCCGTGAGCTGCACCTGGAGATCTGCCTTAAGGACCTGGAGGAGGACCATGCCTGCA  
TCCCCATCAAGGTGGCACCAGAATGGGCGTCTCATCCTTCTGCCTATGTGCTGAGGTGCTGCACCATGTGCTGAGGGTCTATGC  
AGGCCCCCTGGAAGCCCTGATGTGTGACAGTGTGGTCTGTTCCCTTTCACAGAAATCTGACCTGTTGTGTCATATCGGGAGACA  
GTCAGTGAGGAATCCAACGTGTGTGTCTGTCCAAGTCCCCCAATAAGCACAAACCGGCTGTACATGAAGGCCAGGCCCTTCCCTGAT  
GGCCTGGCAGAGGACATCGATAAGGGTGTGGTGTCTGCCCGCCAGGAGCTCAAGGCACGTGCCCGCTACCTGGCCGAAAAGTATGA  
GTGGGACGTTGCTGAAGCCCGCAAGATCTGGTGTCTTGGCCCTGATGGCAGTGGCCCAACATTTTCAACGACATCAACAAGGGTGT  
GCAGTACCTGAATGAGATCAAGGACAGTGTGGTGGCTGGCTTCCAGTGGGCTACTAAGGAGGTAAGTGAAGTCAAGCATTGGTGACC  
TGTGTCTGAGGGGCTGCTGGTGTCTAACTTCCAGCTTTCACAGGGCGCTCTCTGTGAGGAAAAATGCGTGGTGTGCGGTTTTGATG  
TTCATGATGTGACCCTGCATGCTGATGCCATTACCGGGAGGTGGCCAGATCATCCCCACAGCACGCCGCTGCCTGTATGCCAGTG  
TGCTGACCGCACAGCCCCGCTCATGGAGCCTATCTATCTGGTGGAGATCCAGGTAACCTTGTGTATCTTAGGTGGTGTCTGTCTATCC  
TCCTGCCTTGCCTACTGCTCACCATGTTCTCTTTTCCCTGAAGTGTCTGAGCAAGTGGTGGTGGCATCAAGGCTACCTGCTCAATGAGTC  
CAGGAAGCGTGGCCATGTTTTGAGGAGTCCCAAGGTGGTGGTACCCTATGTTTTGTGGTCAAGGCATACCTGCTCAATGAGTC  
CTTTGGTGTGAGTGTCTGGTCCCTGGGGTTTGCAGATAACCTGCAAGGCCTGTGTAATATAGCTGCGGGGTGCAGAACAGAAGCAGATT  
TCTGTATCACGGCCAGCTTGTCTAAGGGTGCAGGAAAGACAGAGCTACAAACTACACAGAGAAACAAAACAAAGGACCCAGG  
AATCCCTCTGGGAGGGGTGGCAAGACAGCTAAGCATGTCCCCCCCCACCCACCCCGGGAAGTACCTGAGTCTCCTGTCT  
TCTGTCTAGGCTTACCGCTGATCTGCGATCCAACACCGGCGGCCAGGCCCTCCCCAGTGGCTGTTTTGACCCTGGCAGATCCCTGCC  
TGGGGATCCTTTTGACAACAGCAGCCGCCAGCCAAGTGGTAGCTGAGACGCGCAAGCGCAAGGGCCTGAAAGAGGGCATCCAG  
CGCTGGACAACTTCTGGACAACTGTAGGCAGCCTGATACTGCCACATGCTGCACAGTGGCCACCCATCAGAAGACACCTTGGAGAC  
TGTCCACAGTGTCTCTAGAGGCTGTGGGGCCACCCTGACATCACTCAGCACTCACTTGTACCAATTTATTTTTCGGAATT  
ACAAGATAGCGGGAATCTCTGACAGGTGGACTGGCAGGCTGTGGGGTGGGCGGGACACGGCTTAAACATTTTACAGAGGGAAAC  
GCGCAGATGTCCAAAAGTCTAAAATAAATGCATTACAGAGGTTTTTGGGGTCCATGGCCAAGTGGAGTTCACCCAGAGGGGGAGGTGG  
GGTAAGTGCCTCCAGGAAGGCAGGCAGCCTGCCTTAGACTTGCAGCCGGCTGTGGGAATGAATCATTGGAGTAATAAACTACAGT  
GGTTGATCCACATGTGCTCGCAACTCTGTTTTGTACAGCGCACGCTTTCCTGGTTTTACGGGTATCTGGCTACCTTAGGTGGCCTGC  
GGTGATTACACATAACACACACTGCACCCCGTGCACAGAATGGGTTTTATTGTGAGTTACAGTACTGCCTCAGTCCATTCCA  
CAAACCTGAATCACTCCATAGACCTGCACATCAGGGGTTTTGGTCTGCGCATACCCGGCTCCAGGTTATTGGCTTTCAGCCTCTCGCT  
TAGCCAATCATCAGCCAGGAGCCAATAATGATGTCTCCACAAGGGCGTGTGCGAGCCTTCTGTGAATCTGTGAGGCTGGCCAAT  
GAGCACTGGACTCTCGCCTAGCCTTGGGTGATGACGTCACTAGTCAACGTCCGCTTCCGCTGAGAGGTGAGATGTAACCAATGAGC  
GTGTGATCAATTTCCGGTTAAAGTCGTAGTCCAATGAGCGCTGGTTTTCGGGTTTTGCGGAGGTGTGCCCTGCGCTGCAGCGCA  
TCCGTAGATGCCGTCTCAGGATTTGTACCGGAGGTTCTCGCGGGGGCTCGCTGGCACCGGGCGGGGACTCGATGGCTGAGGACGG  
TACGAATGGG



| Gn.Ex | Type   | S | .Begin | ...End | .Len | Fr | Ph | I/Ac | Do/T | CodRg | P.... | Tscr.. |
|-------|--------|---|--------|--------|------|----|----|------|------|-------|-------|--------|
| 1.00  | Prom + |   | 580    | 619    | 40   |    |    |      |      |       |       | 1.19   |
| 1.01  | Init + |   | 697    | 699    | 3    | 0  | 0  | 117  | 101  | 0     | 0.419 | 4.13   |
| 1.02  | Intr + |   | 1635   | 1849   | 215  | 2  | 2  | 104  | 94   | 461   | 0.684 | 46.34  |
| 1.03  | Intr + |   | 2023   | 2204   | 182  | 1  | 2  | 104  | 107  | 360   | 0.996 | 39.53  |
| 1.04  | Intr + |   | 2651   | 2862   | 212  | 0  | 2  | 92   | 54   | 573   | 0.994 | 53.46  |
| 1.05  | Intr + |   | 3051   | 3229   | 179  | 2  | 2  | 100  | 117  | 244   | 0.996 | 27.73  |
| 1.06  | Intr + |   | 3316   | 3421   | 106  | 1  | 1  | 92   | 98   | 143   | 0.965 | 16.42  |
| 1.07  | Intr + |   | 3838   | 4090   | 253  | 0  | 1  | 105  | 71   | 482   | 0.988 | 45.74  |
| 1.08  | Intr + |   | 4176   | 4371   | 196  | 1  | 1  | 89   | 64   | 248   | 0.998 | 21.49  |
| 1.09  | Intr + |   | 4447   | 4705   | 259  | 1  | 1  | 75   | 69   | 433   | 0.977 | 38.10  |
| 1.10  | Intr + |   | 4859   | 4966   | 108  | 1  | 0  | 70   | 86   | 165   | 0.999 | 15.48  |
| 1.11  | Intr + |   | 5098   | 5451   | 354  | 0  | 0  | 97   | 107  | 632   | 0.998 | 62.04  |
| 1.12  | Intr + |   | 5522   | 5704   | 183  | 1  | 0  | 56   | 93   | 218   | 0.999 | 19.60  |
| 1.13  | Intr + |   | 5787   | 5919   | 133  | 2  | 1  | 82   | 97   | 136   | 0.999 | 14.62  |
| 1.14  | Term + |   | 6183   | 6376   | 194  | 1  | 2  | 96   | 48   | 341   | 0.739 | 28.81  |
| 1.15  | PlyA + |   | 6630   | 6635   | 6    |    |    |      |      |       |       | 1.05   |

>miR-Otx2\_546-6th\_int\_eEF2 (used in Exp. No.4)

GACAAAAAAGTTTCATGAGAGCGTGGTGTGGTGGCACAGTCTTTTAGTCCGAGCACTGACGCAGTAGATTAAGGCAGATCTTCATG  
 ATTTGGTGC GGTCCTGGGCTGCATCCAAAGACCTTGTTCCTCCAAAACAAACAAACGAAAAAGTGTAAATAAAAAACAAGCAAGGTTT  
 TGCAGAAATAAATCTGTGGCCTCAAGGGTCCCTTTCTCCAGCTTTTCCAGAGGTGTCAAATTACATAACAGTCTCAAACCCAGGAA  
 ATTGAACCTTTGGCACAACCCACTGACCGGTCCGAATTTCAAAGTCTTTTTCTATTGACCTACAAGGTTTTCAAGAATCATGTTGTAA  
 GCAACTGTGTTCTGAAATCTATGTTTAAAAAACCCATCCGTGGATCTTGCCCAAGGTTCCAGAGACTGAGCTAGCCACGCCCCGGC  
 CGCGCCGACGCACTCCACGGCAGTTCAAGTGTAAAGTCCCAAAGACCGGCTCTGTGCATGCGCAGACCCGTCACAGCTGGCTC  
 CTAGCCAAACCCGGCCGACGAGCACCCGGCGCCGTACGTGACGCACCCAACCGGCTCGACCTATAAAAAGGCCGGGCTTGACGT  
 CAGCGGTCTCTCCGCCGACGCCGCCCATCGTCGGCGCGCTTCCCTGTTACCTCTGACTCTGAGAATCCGTCGCCATCCGCCACC  
 ATGGTGTGCTCTCCGCTCCGCTAGACTCGGGGACGACGCTCCGAGCAATCTCTGGGGCAGCGGGACGTGGCTGACGGGACGCTGAGA  
 GGGACGGGAGGAAGAGACATGGCTGCCCTGGCCGGGGCAGGACGTGGTCCGGCCGCGGCCATATCTGCGGCTCCCTGAGG  
 GCCTTGGGAGTGTCAACTGCCGAGGTCCGGGTGTTTCTTGAAGTCTTCAACTCCCCGCGCCGCCGGGGTGTGCGGGAGGGGT  
 TGTGCTTGGTGTGTGGCAGCGGCAAGCGCCCTCCCGCGCCCTGGTACGGGGGAGGGTGTCTCGGGAGGTGACAGCCTG  
 TAGGGCTGGTTCCTTGGACACCTCCAGTGGGCTGAACGCCTTCCGGCCCTTCCGGTAGCCCCGCTCTGTTTTCTATCTGAGT  
 CACACGTGAGCACCGGTCCCAATAATCTAAGAAAGTGGCTACTGGGCTAGTGGCGCATTGTGGCCTTTGATCCGGGCTTTGACCT  
 TGGCGCACAGCACCCAGTGGTTGGGGAAGAGGTGTGTGTAGCAGAGGAGGTTTTTCGTGCTTTGGTCCCAATCAATCCGGCATCT  
 TTGCAGTGCAGGTGGCCGTGCACCTTGGCTTTGAATCTTGTGCTGAGGTTATGTGACTTGAGCCTCAAGATAGGGTCTTCTAGCA  
 CAGGCTTGGTTCCTTGGACACCTCCAGTGGGCTGACGCCTTCCGGCCCTTCCGGTCCCTTCCGGTCCCTGCTGTTTTGCTGCCAG  
 AGGTCCTGGGTTGTACGTTTGTAGTCACTGTGAGCTAGCTCCAATCTTGGGCCGACATCTGGTTCCTGCCCTGTGGGGTGT  
 ATTGACCACCGATGCCTGCCAAGTTGGGTTCCAGAATCAGCTGGCTGCCATCCCCCACCACAGTGAACCTCACAGTAGATC  
 AGATCCGTGCCATCATGGACAAGAAAGCCAACATCCGGAACATGTCAGTATCGCCATGTGGACCACGGCAAGTCCACGCTGACC  
 GACTCCCTTGTGTCAAGGCTGGCATCTTGCCTCTGCCGAGCTGGGGAGACGCGCTTCACTGACACTCGCAAGGATGAGCAGGAG  
 CGTGCATCAAAATCCACGTGAGTGAGGGGACAGCCCGAGGGGTTGTGCTCTGGGTGTCACTCGGGTGTGTTTGGCTGCCAG  
 TGGACAAATAGTGGCGTGTAGGGTCTCTGTGACATGCTTGTGTGTGCTGCCTAGCCTGCCTTGGTCAGATGCTGAATGGACTG  
 TTGACCTTCTCCTCCGTAGCGCCATCTCCCTTCTACGAGCTCTCTGAGAACGACCTGAACCTCATTAAAGCAGAGCAAGGATGGC  
 TCGGGCTTCTCATCAACCTCATCGACTCTCCAGGCCATGTGGACTTCTTTCAGAGGTGACAGCTGCCTTGGCTGTCACCGATGGAG  
 CTCTGGTGGTGGTGGACTGTGTCTGTAAAGCCTTGGGTGGGAGCTGTAACAGACAGTTGCTGGTGTTCATGGCCCAAGTACCAC  
 ATTTTGGGGGTGTAAATGAAATCATATTCATTTTAAAGCAAGGATGAATCTGCTCTAATTTGAAATTTGATGTGCCAGTCCCAT  
 GTCAGGGCAGGGAGATTGTGAAGTCCACCTAAGTGTGGGGCCAGTTTCTATAATTCAGTGTCTGAGGCAGAGGTGCATGGGTCT  
 CTGGAGGTGGGAGGGGCTGAGTGGCATAGGGCCTGGTACACTGGACACACTGGAGATTTAGCGCCTGGGCATCCATACCGTGTAC  
 CTTGGAGAGTGTGTGATCATTTCACAGACAAAACATACGTGGTCTTCCAGCCTTGAACCTGACAGTGGTGTAGAGTACTGAGAGT  
 TAAGGGTAAACACTTAGTCTTTTACCCTGTCTCAGGCGTGTGTGTCAGACAGAAACTGTGCTGCGCCAGGCCATCGCTGAACG  
 CATCAAGCCGCTCTGATGATGAACAAGATGGACCGGCCCTGCTGGAGCTGACAGTGGAGCCGAGGAGCTCTACCAGACCTTCC  
 AGCGCATCGTGGAGAACGTCAACGTCACTCTACTACGGCAGGGGCGAGAGTGGGCCATGGGCAATATCATGTTGCGAAGC  
 TCTTCTATGGGGGGCGGTACGGCCACGCTCCCTGGGAATCTGACCCACATGATACGGAAATCTTCACTTTGACCTGATGTCT  
 GTTGAAGAACTCAGTGTCTGAGACTGTGGGCTTGTGGTGGGCTGGTGTGCTGCTGACCTATGCGGGCTAATGCTCTCCTCCCT  
 CAGATTGACCCGCTCTGGCACCGTAGGCTTTGGTCTGGCCTGCATGGTGGGCTTCCACCTGAAGCAGTTTGGGAGATGTAT  
 GTGGCCAAGTTTGCAGCCAAGGCTGAGGGCCAGCTGACGCGACGCCGAGCTGCAAGAAAGTAGAGGACATGATGAAGAAGCTGT  
 GGGGAGACCGGTGAGTACATGGCTGTGACTGTCTACCCCTGCTACTTGTGGACAATGCCTGCCTGCCGATACTATGTGACTGC  
 TCTTACAGGTAATTTGATCCGGCCAATGGCAAAGTTCAAGTCAAGCTAGCCAAATAGCCAGATGGGAAAAAACTTCCCGCACCTTCCG  
 CCAGCTCATCTGGACCCATCTTCAAGTGGGTAAGCTGTGGTCTGGCCTGTGTTCCAGCTAGTGTGAGTCCGACCTGATGATCTG  
 GAGGCTTGTGAAGGCTGTATGCTGTAGCCTTGACTATAACCTGAAGTTTTGGCCACTGACTGACTTCAGGTTAGTCAAGGCTACAG
